# Supplementary material
Source: publisher site journal article supplement (https://www.dovepress.com/article/449213)
Supplement: Supplementary file 1 [file get_supplementary_file.php]

| **Supplemental table S1. Definition of** potential extreme/implausible values for anthropometric and biochemical variables | | | |
| --- | --- | --- | --- |
|  | **Values** | |
| **Glucose (mg/dl)** | <30 or >600 |  |
| **Triglycerides (mg/dl)** | <10 or >1.000 |
| **HDL-C (mg/dl)** | <10 or >118 |
| **SBP (mm / Hg)** | <80 or >280 |
| **DBP (mm/Hg)** | <50 or >195 |
| **Waist (cm)** | <50 or >198 |
| **BMI (Kg/m2)** | >70 |
| SBP: Systolic Blood Pressure; DBP: Diastolic Blood Pressure; HDL-C: High density lipoprotein cholesterol. BMI: Body mass index | | | |

| **Supplemental Table S2. Identification of the study sample** | | | |
| --- | --- | --- | --- |
| **Initial sample** | **Exclusion criteria** | ***n* excluded** | **Remaining sample** |
| **69,883** | Missing values for  anthropometric and biochemical variables | 19,505 | 50,378 |
| **50,378** | Potential extreme/implausible values for  anthropometric and biochemical variables | 2,589 | 47,789 |
| **47,789** | Diagnostic of any of the following diseases: diabetes, kidney disease, cerebrovascular and cardiovascular disease | 10,231 | **37,558**  **(Final sample)** |

| **Supplemental Table S3. Anthropometric and biochemical variables in the whole sample and throughout weight status phenotypes** | | | | | | |
| --- | --- | --- | --- | --- | --- | --- |
|  | **Whole sample**  **n = 37,558** | **MHNW**  **(n = 767)** | **MHO**  **(n=1,164)** | **MUO**  **(n=26,893)** | **MUNW**  **(n= 8,734)** | **P-value** |
| **Body mass index (kg/m2)**  -Median  -Interquartile range | 27.8  24.9 - 31.3 | 22.8  21.6 - 23.8 | 28.5  26.5 - 32 | 29.4  27.1 - 32.7 | 23.2  22 - 24.1 | <0.001 |
| **Waist circumference (cm)**  -Median  -Interquartile range | 94  88 - 102 | 85  78 - 90 | 94  88 - 101 | 98  91 - 105 | 86  81 - 91 | <0.001 |
| **Systolic blood pressure (mm/Hg)**  -Median  -Interquartile range | 120  120 - 140 | 120  110 - 120 | 120  110 - 120 | 126  120 - 140 | 120  120 - 140 | <0.001 |
| **Diastolic blood pressure (mm/Hg)**  -Median  -Interquartile range | 80  70 - 80 | 74  70 - 80 | 78  70 - 80 | 80  70 - 82 | 80  70 - 80 | <0.001 |
| **Glucose (mg/dl)**  -Median  -Interquartile range | 96  89 - 105 | 89  84 - 94 | 90  85 - 95 | 97  90 - 106 | 94  88 - 102 | <0.001 |
| **HDL Cholesterol (mg/dl)**  -Median  -Interquartile range | 44  37 - 52 | 57  50 - 65 | 56  51 – 63.7 | 43  36 - 50 | 45  38 - 54 | <0.001 |
| **LDL Cholesterol (mg/dl)**  -Median  -Interquartile range | 111  87 - 136 | 95.8  77 - 111 | 100  83 - 115 | 112  88 - 137 | 113  88 - 139 | <0.001 |
| **Triglycerides levels (mg/dl)**  -Median  -Interquartile range | 150  110 - 206 | 94  74 - 114 | 100  81 - 121 | 159  118 - 215 | 142  104 - 193 | <0.001 |
| MHNW: Metabolically Healthy Normal Weight, MHO: Metabolically Healthy Overweight, MUO: Metabolically Unhealthy Overweight, MUNW: Metabolically Unhealthy Normal Weight. | | | | | | |

| **Supplemental Table S4. Multivariable models* explaining for each discordant weight status phenotype (vs. metabolically healthy normal weight) by sex** | | | | | |
| --- | --- | --- | --- | --- | --- |
| Women | | | Men | | |
| **Outcome MUNW** |  |  |  |  |  |
| (model n=5516 ) | OR (95% CI) | P-value | (model n= 3,538) ) | OR (95% CI) | P-value |
| Residence area |  |  | Age group (years) |  |  |
| Urban | 1.0 |  | 18-39 | 1.0 |  |
| Rural | 1.71 (0.99-2.96) | 0.054 | 40-60 | 1.99 (0.95-4.17) | 0.087 |
| Alcohol intake  (at least once a week) |  |  | >60 | 1.89 (0.94-3.78) | 0.091 |
| No | 1.0 |  | Increased WC |  |  |
| Yes | 3.08 (0.97-9.75) | 0.055 | No | 1.0 |  |
| Increased WC |  |  | Yes | 1.38 (1.09-1.74) |  |
| No | 1.0 |  |  |  |  |
| Yes | 1.8 (1.45-2.27) | <0.001 |  |  |  |
|  |  |  |  |  |  |
| **Outcome MHO** |  |  |  |  |  |
| (model n=1164) | OR (95% CI) | P-value | (model n=519) | OR (95% CI) | P-value |
| Alcohol intake  (at least once a week) |  |  | Age group (years) |  |  |
| No | 1.0 |  | 18-39 | 1.0 |  |
| Yes | 3.02 (0.84-10.81) | 0.089 | 40-60 | 8.34 (146-47.68) | 0.017 |
| Increased WC |  |  | >60 | 3.10 (0.58-16.58) | 0.184 |
| No | 1.0 |  | Smoking  (at least once a week) |  |  |
| Yes | 6.99 (4.95-9.87) | <0.001 | No | 1.0 |  |
| Marital status |  |  | Yes | 0.39 (0.22-0.67) | 0.001 |
| Single | 1.0 |  | Increased WC |  |  |
| Divorced | 1.11 (0.55-2.25) | 0.762 | No | 1.0 |  |
| Free union | 1.53 (0.94-2.46) | 0.080 | Yes | 6.45 (4.26-9.76) | <0.001 |
| Married | 1.03 (0.75-1.40) | 0.845 | Ethnicity |  |  |
| Widow/widower | 0.78 (0.50-1.20) | 0.267 | General population | 1.0 |  |
|  |  |  | Afro-descendant | 4.01 (0.93-17.2) | 0.062 |
|  |  |  | Indigenous | 0.83 (0.02-28.2) | 0.921 |
|  |  |  | Palenquero | 1.58 (0.22-11.05) | 0.639 |
|  |  |  | Raizal | 1.04 (0.50-2.17) | 0.904 |
|  |  |  | ROM | * |  |
|  |  |  |  |  |  |
| **Outcome MUO** |  |  |  |  |  |
| (model n =19750) | OR (95% CI) | P-value | (model n =5,223) | OR (95% CI) | P-value |
| Residence area |  |  | Age group (years) |  |  |
| Urban | 1.0 |  | 18-39 | 2.37 (0.95-5.91) | 0.063 |
| Rural | 1.74 (1.005-3.02) | 0.048 | 40-60 | 1.22 (0.51-2.87) | 0.646 |
| Alcohol intake  (at least once a week) |  |  | >60 |  |  |
| No | 1.0 |  | Education level |  |  |
| Yes | 2.69 (0.85-8.55) | 0.092 | Illiterate | 1.0 |  |
| Increased WC |  |  | Elemental | 1.16 (0.80-1.68) | 0.426 |
| No | 1.0 |  | Secondary | 1.78 (1.10-2.86) | 0.017 |
| Yes | 21.13 (16.77-26.63) | <0.001 | Thechnical education | 2.32 (0.29-18.42) | 0.424 |
| Ethnicity |  |  | Undergraduate | 1.93 (0.24-15.50) | 0.536 |
| General population | 1.0 |  | Graduate | ** |  |
| Afro-descendant | 0.90 (0.48-1.70) | 0.764 | Smoking  (at least once a week) |  |  |
| Indigenous | 1.75 (0.23-13.35) | 0.585 | No | 1.0 |  |
| Palenquero | 0.98 (0.13-7.11) | 0.987 | Yes | 0.50 (0.35-0.71) | <0.001 |
| Raizal | 1.18 (0.78-1.79) | 0.409 | Increased WC |  |  |
| ROM | 0.28 (0.97-0.83) | 0.022 | No | 1.0 |  |
|  |  |  | Yes | 14.96 (0.35-0.71) | <0.001 |
|  |  |  | Ethnicity |  |  |
|  |  |  | General population |  |  |
|  |  |  | Afro-descendant | 1.35 (0.39-4.61) | 0.625 |
|  |  |  | Indigenous | ** |  |
|  |  |  | Palenquero | 2.27 (0.05-0.98) | 0.047 |
|  |  |  | Raizal | 1.05 (0.62-1.79) | 0.833 |
|  |  |  | ROM | ** |  |
| *Some multiple models contain exposure variables with marginal significance (p-value ≥ 0.05 and <0.1) to describe the trend of these variables and effect estimates for statistically significant associated variables did no substantially change by removing or keeping variables with marginal significance. ** Effect estimate not calculated because of very low number of cases in this category.  MHO: Metabolically Healthy Overweight, MUO: Metabolically Unhealthy Overweight, MUNW: Metabolically Unhealthy Normal Weight.  WC: Waist circumference | | | | | |
